# Supplementary material for: Comparison of Serum Spec fPL™ and 1,2‐o‐Dilauryl‐Rac‐Glycero‐3‐Glutaric Acid‐(6′‐Methylresorufin) Ester Assay in 60 Cats Using Standardized Assessment of Pancreatic Histology
Source: PubMed Central journal article supplement — J Vet Intern Med. 2016 Mar 10;30(3):764–70. doi: 10.1111/jvim.13924 (PMC4913568; doi:10.1111/jvim.13924), 2016-03-10
Supplement: JVIM-30-764-s001.pdf [file JVIM-30-764-s001.pdf]

**Supplementary Table:** Results of cats with pancreatitis and neoplasia.

| Type of neoplasm | AI             | MC<br>S <sub>neutr</sub><br>ophilic<br>inflam<br>mation | MC<br>S <sub>lymp</sub><br>hocytic<br>inflam<br>mation | MC<br>S <sub>pancr</sub><br>eatic<br>edema | MC<br>S <sub>pancr</sub><br>eatic<br>necrosi<br>s | MC<br>S <sub>fat</sub><br>necrosi<br>s | Spec fPL<br>(Cutoff<br>>3.5 µg/L<br>and ≥5.4<br>µg/L) | DGGR<br>assay<br>(Cutoff<br>>26<br>U/L) |         |
|------------------|----------------|---------------------------------------------------------|--------------------------------------------------------|--------------------------------------------|---------------------------------------------------|----------------------------------------|-------------------------------------------------------|-----------------------------------------|---------|
| Case 1           | Lymphoma       | 0.06                                                    | 0                                                      | 0                                          | 0.30                                              | 0                                      | 0                                                     | 1.8 µg/L                                | 17 U/L  |
| Case 2           | Lymphoma       | 0.11                                                    | 0                                                      | 0.50                                       | 0                                                 | 0                                      | 0.07                                                  | 33 µg/L                                 | 130 U/L |
| Case 3           | Lymphoma       | 0.12                                                    | 0                                                      | 0.60                                       | 0                                                 | 0                                      | 0                                                     | 18.0 µg/L                               | 41 U/L  |
| Case 4           | Lymphoma       | 0.01                                                    | 0                                                      | 0.06                                       | 0                                                 | 0                                      | 0                                                     | 2.3 µg/L                                | 12 U/L  |
| Case 5           | Lymphoma       | 0.17                                                    | 0                                                      | 0.85                                       | 0                                                 | 0                                      | 0                                                     | 5.2 µg/L                                | 15 U/L  |
| Case 6           | Adenocarcinoma | 0.10                                                    | 0                                                      | 0.45                                       | 0                                                 | 0.05                                   | 0                                                     | 0.5 µg/L                                | 46 U/L  |
| Case 7           | Adenocarcinoma | 0.30                                                    | 0                                                      | 1.00                                       | 0.25                                              | 0.25                                   | 0                                                     | >50 µg/L                                | 570 U/L |
| Case 8           | Adenocarcinoma | 0.15                                                    | 0                                                      | 0.75                                       | 0                                                 | 0                                      | 0                                                     | 3.5 µg/L                                | 13 U/L  |
| Case 9           | Mastocytoma    | 0.09                                                    | 0                                                      | 0.44                                       | 0                                                 | 0                                      | 0                                                     | 20.0 µg/L                               | 47 U/L  |
